# Supplementary material
Source: PubMed Central journal article supplement (PMC5399110)
Supplement: 10.1074_M116.742627_jbc.M116.742627-1.pdf [file 10.1074_M116.742627_jbc.M116.742627-1.pdf]

## Supplemental Information

**Table S1: Endothelial cell function-associated transcripts that met the recommended cut-off threshold values ( $C_t \leq 30$ ) in either the control or NOSTRIN-over expressed samples in the array.**

| Sl. No | Gene Symbol | Control Ct (Average) | NOSTRIN Ct (Average) | Fold Change | Gene Description                                           |
|--------|-------------|----------------------|----------------------|-------------|------------------------------------------------------------|
| 1      | Ace         | 26.38                | 28.55                | -5.4514     | Angiotensin I converting enzyme (peptidyl-dipeptidase A) 1 |
| 2      | Adam17      | 21.44                | 22.77                | -3.0424     | A disintegrin and metallopeptidase domain 17               |
| 3      | Anxa5       | 18.47                | 19.59                | -2.6115     | Annexin A5                                                 |
| 4      | Apoe        | 26.72                | 27.14                | -1.6124     | Apolipoprotein E                                           |
| 5      | Bax         | 20.47                | 20.8                 | -1.5209     | Bcl2-associated X protein                                  |
| 6      | Bcl2        | 23.27                | 24.32                | -2.4977     | B-cell leukemia/lymphoma 2                                 |
| 7      | Bcl2l1      | 22.66                | 21.62                | 1.708       | Bcl2-like 1                                                |
| 8      | Casp3       | 23.04                | 24.82                | -4.1379     | Caspase 3                                                  |
| 9      | Cav1        | 17.56                | 18.53                | -2.3664     | Caveolin 1, caveolae protein                               |
| 10     | Ccl2        | 17.76                | 19.2                 | -3.2802     | Chemokine (C-C motif) ligand 2                             |
| 11     | Ccl5        | 17.93                | 20.77                | -8.6405     | Chemokine (C-C motif) ligand 5                             |
| 12     | Cdh5        | 19.26                | 19.72                | -1.6596     | Cadherin 5                                                 |
| 13     | Cflar       | 23.4                 | 23.39                | -1.2007     | CASP8 and FADD-like apoptosis regulator                    |
| 14     | Col18a1     | 28.28                | 31.25                | -9.4839     | Collagen, type XVIII, alpha 1                              |
| 15     | Cradd       | 27.46                | 28.26                | -2.0965     | CASP2 and RIPK1 containing adaptor with death domain       |
| 16     | Cx3cl1      | 28.89                | 29.39                | -1.7088     | Chemokine (C-X3-C motif) ligand 1                          |
| 17     | Cxcl1       | 26.14                | 23.49                | 5.2081      | Chemokine (C-X-C motif) ligand 1                           |
| 18     | Cxcl2       | 27.55                | 24.73                | 5.8402      | Chemokine (C-X-C motif) ligand 2                           |
| 19     | Edn1        | 26.86                | 25.31                | 2.4132      | Endothelin 1                                               |
| 20     | Eng         | 21.99                | 22.13                | -1.3299     | Endoglin                                                   |
| 21     | F2r         | 21.41                | 22.12                | -1.9771     | Coagulation factor II (thrombin) receptor                  |
| 22     | F2rl1       | 23.25                | 23.95                | -1.9538     | Coagulation factor II (thrombin) receptor-like 1           |
| 23     | F3          | 27.98                | 27.84                | -1.0955     | Coagulation factor III                                     |
| 24     | Fas         | 26.12                | 26.38                | -1.4383     | Fas (TNF receptor superfamily member 6)                    |
| 25     | Fasl        | 29.72                | 29.29                | 1.1189      | Fas ligand (TNF superfamily, member 6)                     |
| 26     | Fgf1        | 27.82                | 29.02                | -2.7709     | Fibroblast growth factor 1                                 |
| 27     | Flt1        | 24.16                | 25.07                | -2.2661     | FMS-like tyrosine kinase 1                                 |
| 28     | Fn1         | 21.21                | 22.75                | -3.5179     | Fibronectin 1                                              |
| 29     | Hif1a       | 20.39                | 21.09                | -1.9512     | Hypoxia inducible factor 1, alpha subunit                  |
| 30     | Icam1       | 25.6                 | 25.79                | -1.3737     | Intercellular adhesion molecule 1                          |
| 31     | Il6         | 24.03                | 26.68                | -7.5833     | Interleukin 6                                              |
| 32     | Il7         | 27.06                | 27.25                | -1.3772     | Interleukin 7                                              |
| 33     | Itga5       | 20.73                | 22.25                | -3.4566     | Integrin alpha 5 (fibronectin receptor alpha)              |
| 34     | Itgav       | 21.7                 | 21.72                | -1.2217     | Integrin alpha V                                           |
| 35     | Itgb1       | 18.28                | 18.86                | -1.8076     | Integrin beta 1 (fibronectin receptor beta)                |

|    |          |       |       |         |                                                             |
|----|----------|-------|-------|---------|-------------------------------------------------------------|
| 36 | Itgβ3    | 22.37 | 24.36 | -4.7976 | Integrin beta 3                                             |
| 37 | Kdr      | 20.93 | 22.45 | -3.4719 | Kinase insert domain protein receptor                       |
| 38 | Kit      | 22.7  | 27    | -23.700 | Kit oncogene                                                |
| 39 | Mmp1a    | 29.26 | 31.15 | -4.4491 | Matrix metalloproteinase 1a (interstitial collagenase)      |
| 40 | Mmp2     | 26.1  | 27.18 | -2.5489 | Matrix metalloproteinase 2                                  |
| 41 | Mmp9     | 29.92 | 31.53 | -3.6915 | Matrix metalloproteinase 9                                  |
| 42 | Nos3     | 22.7  | 23.89 | -2.7528 | Nitric oxide synthase 3, endothelial cell                   |
| 43 | Nppb     | 25    | 25.07 | -1.2652 | Natriuretic peptide type B                                  |
| 44 | Npr1     | 27.82 | 29.39 | -3.5733 | Natriuretic peptide receptor 1                              |
| 45 | Ocln     | 29.45 | 31.71 | -5.7912 | Occludin                                                    |
| 46 | Pdgfra   | 28.74 | 29.62 | -2.22   | Platelet derived growth factor receptor, alpha polypeptide  |
| 47 | Pecam1   | 17.04 | 18.8  | -4.0806 | Platelet/endothelial cell adhesion molecule 1               |
| 48 | Pf4      | 25.33 | 25.99 | -1.9043 | Platelet factor 4                                           |
| 49 | Pgf      | 21.83 | 26.24 | -25.530 | Placental growth factor                                     |
| 50 | Plat     | 21.75 | 22.41 | -1.911  | Plasminogen activator, tissue                               |
| 51 | Plau     | 20.84 | 23.93 | -10.282 | Plasminogen activator, urokinase                            |
| 52 | Procr    | 16.7  | 16.99 | -1.4813 | Protein C receptor, endothelial                             |
| 53 | Ptgis    | 25.85 | 25.83 | -1.1898 | Prostaglandin I2 (prostacyclin) synthase                    |
| 54 | Ptgs2    | 22.69 | 22.23 | 1.1406  | Prostaglandin-endoperoxide synthase 2                       |
| 55 | Sele     | 23.81 | 24.88 | -2.5229 | Selectin, endothelial cell                                  |
| 56 | Selp     | 20.56 | 21.41 | -2.1812 | Selectin, platelet                                          |
| 57 | Selplg   | 29.19 | 30.45 | -2.8827 | Selectin, platelet (p-selectin) ligand                      |
| 58 | Serpine1 | 23.11 | 23.46 | -1.5399 | Serine (or cysteine) peptidase inhibitor, clade E, member 1 |
| 59 | Sod1     | 17.96 | 18.82 | -2.1893 | Superoxide dismutase 1, soluble                             |
| 60 | Tek      | 22.39 | 24.98 | -7.2576 | Endothelial-specific receptor tyrosine kinase               |
| 61 | Tfpi     | 22.9  | 23.9  | -2.4146 | Tissue factor pathway inhibitor                             |
| 62 | Tgfb1    | 21.78 | 21.93 | -1.3377 | Transforming growth factor, beta 1                          |
| 63 | Thbd     | 23.43 | 23.32 | -1.1214 | Thrombomodulin                                              |
| 64 | Thbs1    | 19.35 | 20.34 | -2.3842 | Thrombospondin 1                                            |
| 65 | Timp1    | 20.71 | 21.24 | -1.7388 | Tissue inhibitor of metalloproteinase 1                     |
| 66 | Tnfsf10  | 28.44 | 29.08 | -1.8851 | Tumor necrosis factor (ligand) superfamily, member 10       |
| 67 | Vcam1    | 22.75 | 22.68 | -1.1491 | Vascular cell adhesion molecule 1                           |
| 68 | Vegfa    | 24.9  | 25.04 | -1.3372 | Vascular endothelial growth factor A                        |

**Table S2: Specific primer sequences used for qRT-PCR analysis.**

| Sl. No. | Primer name |     | Sequence (5' to 3')       | Gene Bank Accession no. |
|---------|-------------|-----|---------------------------|-------------------------|
| 1       | Ace         | Fwd | CCCAGATCCCAAACCTAGAGACT   | NM_009598               |
|         |             | Rev | GGATCTTGCTGCCCTCTATGG     |                         |
| 2       | Adam-17     | Fwd | AACACGTCGTGGGATAATGCA     | NM_009615               |
|         |             | Rev | AAGCATCCTTCTCTTCGTTTGG    |                         |
| 3       | Anxa5       | Fwd | TGACATCCCGAAGCAATGC       | NM_009673               |
|         |             | Rev | CGTAGAGTCGTGAGGGCTTCA     |                         |
| 4       | Bcl2        | Fwd | CGCCCTGTGGATGACTGAGT      | NM_009741               |
|         |             | Rev | GGCTGAGCAGGGTCTTCAGA      |                         |
| 5       | Casp3       | Fwd | GAGCTGGACTGTGGCATTGA      | NM_009810               |
|         |             | Rev | AACCACGACCCGTCCTTTG       |                         |
| 6       | Cav1        | Fwd | GACCCCAAGCATCTCAACGA      | NM_007616               |
|         |             | Rev | AGACAACAAGCGGTAAAACCAATAT |                         |
| 7       | Ccl2        | Fwd | AAAACCTGGATCGGAACCAAA     | NM_011333               |
|         |             | Rev | TGCTTGAGGTGGTTGTGGAA      |                         |
| 8       | Ccl5        | Fwd | GACACCACTCCCTGCTGCTT      | NM_013653               |
|         |             | Rev | CTTCTCTGGGTGGCACACA       |                         |
| 9       | Col18a1     | Fwd | AAGCTGACCTTCATTGACATGGA   | NM_009929               |
|         |             | Rev | TAGGAACCATTGATCCCAAAGC    |                         |
| 10      | Edn1        | Fwd | GCCCAAAGTACCATGCAGAAA     | NM_010104               |
|         |             | Rev | GATGCCTTGATGCTATTGCTGAT   |                         |
| 11      | Fgf1        | Fwd | ACAAAAGCCCAAAGTCTCTACT    | NM_010197               |
|         |             | Rev | TTATATACTTCGCCCCGCACTT    |                         |
| 12      | Flt-1       | Fwd | ATCGGCCATCATCTGAATGTG     | NM_010228               |
|         |             | Rev | TGCGTCCTTGTTGAGACAGAA     |                         |
| 13      | Fn1         | Fwd | AAGGTTCCGGAAGAGGTTGTG     | NM_010233               |
|         |             | Rev | GAGCTTAAAGCCAGCGTCAGA     |                         |
| 14      | IL-6        | Fwd | GTGCAATGGCAATTCTGATTGT    | NM_031168               |
|         |             | Rev | TCCAGAAGACCAGAGGAAATTTTC  |                         |

|    |         |     |                         |           |
|----|---------|-----|-------------------------|-----------|
| 15 | Itga5   | Fwd | GCCGTACCCAGACTTCTTTG    | NM_010577 |
|    |         | Rev | GAGAGATGCGCTGGCAGATAT   |           |
| 16 | Itgβ3   | Fwd | GCGTGTCCCGTAATCGAGAT    | NM_016780 |
|    |         | Rev | TTCCATCCAGGGCAATATGG    |           |
| 17 | Kdr     | Fwd | GTGAATGTCCCACCCAGAT     | NM_010612 |
|    |         | Rev | CAGGCTTCTTCTAGCTGCCAGTA |           |
| 18 | Kit     | Fwd | TTTACATAGACCCGACGCAACTT | NM_021099 |
|    |         | Rev | TCATGGCAGCATCCGACTTA    |           |
| 19 | Mmp1a   | Fwd | TGTTGCTTCTCTGGGCTGCTA   | NM_032006 |
|    |         | Rev | CATCTCCTTGCCATTCACGTT   |           |
| 20 | Mmp2    | Fwd | TCTGATGGCCCCGATCTACA    | NM_008610 |
|    |         | Rev | AGTGACAGGTCCAGTGTTGGT   |           |
| 21 | Mmp9    | Fwd | CCAAAGACCTGAAAACCTCCAA  | NM_013599 |
|    |         | Rev | GCAGGGAGAGCTGCTTCTGA    |           |
| 22 | Nos-3   | Fwd | TCTGCGGCGATGTCACTATG    | NM_008713 |
|    |         | Rev | TCCGAAAATGTCCTCGTGGTA   |           |
| 23 | Npr1    | Fwd | TGCTCTATGTCCAGGCAGTGA   | NM_008727 |
|    |         | Rev | TCAGTGTCCCGATCTCCATT    |           |
| 24 | PECAM 1 | Fwd | CTCACGCTGGTGCTCTATGC    | NM_008816 |
|    |         | Rev | TTTCGAGGTGGTGCTGATGTC   |           |
| 25 | PGF     | Fwd | TGGCTGCTGTGGTGATGAAG    | NM_008827 |
|    |         | Rev | CTGCATTCACAGAGCACATCCT  |           |
| 26 | Plau    | Fwd | ACTGCTTCATTCAACTCCCAAAG | NM_008873 |
|    |         | Rev | TATGGTAGGCCAGGCTGTCTTC  |           |
| 27 | Sele    | Fwd | CTTGCATGGCTCAGCTCAAC    | NM_011345 |
|    |         | Rev | TGTGCCGAAAACCTGCTGTTC   |           |
| 28 | Selp    | Fwd | TGGAAAAGTCAACATCCCTCAA  | NM_011347 |
|    |         | Rev | TCCCAGAAGCCAAACATTGC    |           |
| 29 | Sod1    | Fwd | GCGGTGAACCAGTTGTGTTG    | NM_011434 |
|    |         | Rev | CGGGCCACCATGTTTCTTAG    |           |
| 30 | Tek     | Fwd | TGGAAGAGAGAAAAGGCCAGTAA | NM_013690 |
|    |         | Rev | CTCCCCTGTCCACGGTCATA    |           |

|    |       |     |                        |           |
|----|-------|-----|------------------------|-----------|
| 31 | Tfpi  | Fwd | TCTGCCGAGGTTACATGAAGAG | NM_011576 |
|    |       | Rev | GGGAGTGGACTGGATTCTCACA |           |
| 32 | Thbs1 | Fwd | TGGAACCACCCCAGAAGACA   | NM_011580 |
|    |       | Rev | GCTTGGAGGTCCTTTGTTTTGT |           |
